# Supplementary material
Source: publisher figshare collection journal article supplement (https://frontiersin.figshare.com/ndownloader/files/13214066)
Supplement: Supplementary file [file 13214066]

Fig. S1

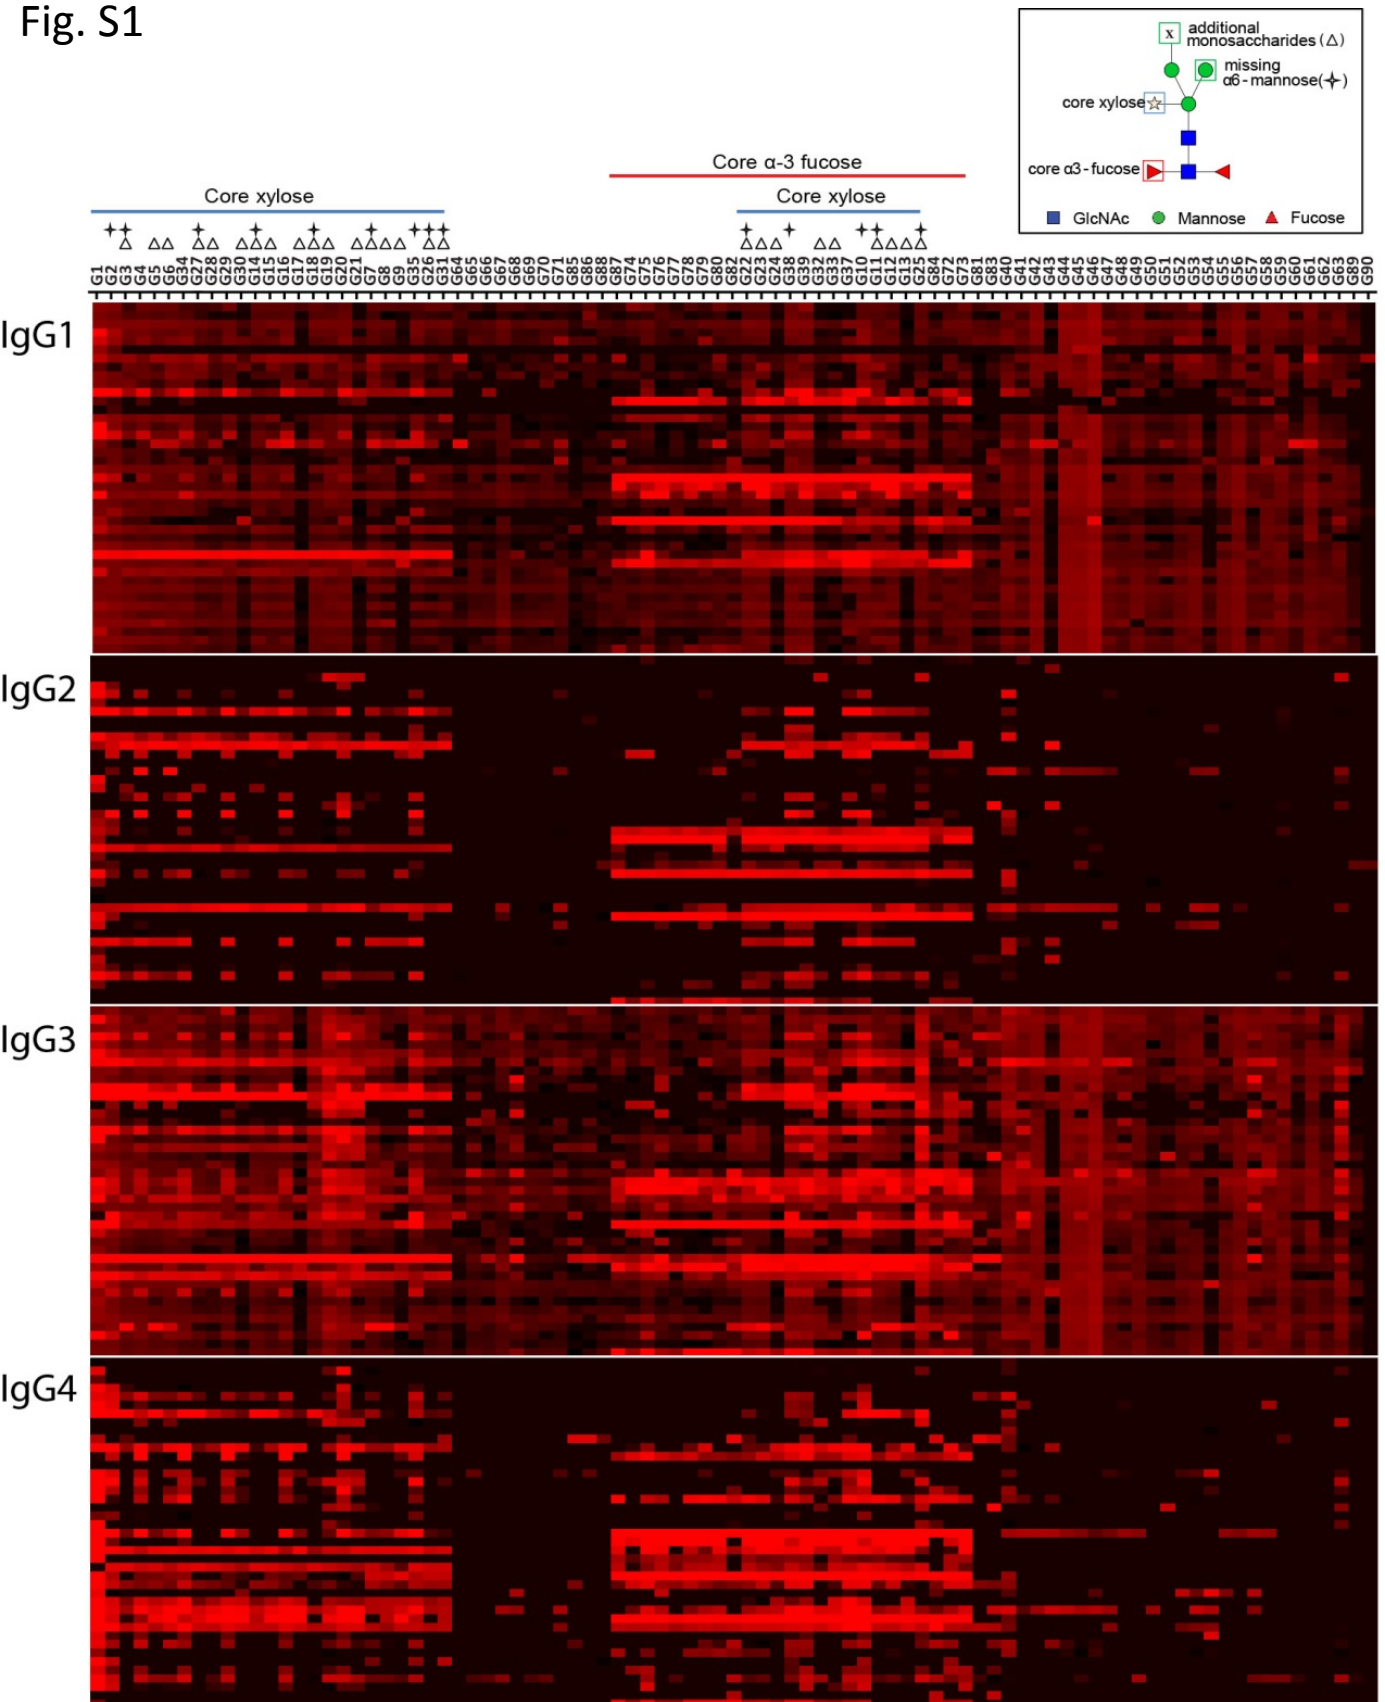

**Supplementary figure S1. Hierarchical clustering analysis of anti-glycan IgG1, IgG2, IgG3 and IgG4 responses in *S. mansoni* infected individuals.** Heatmap showing IgG subclass response of schistosome infected subjects to core modified N-glycans that have been synthesized and described by Brzezicka *et al.*. Median fluorescence intensity was corrected for baseline and  $\log_2$  transformed; increase in antibody binding is indicated by the red color intensity. The glycan code for each structure (Brzezicka *et al.*, 2015) is indicated and core xylosylated and core  $\alpha$ -3 fucosylated structures are marked. Within core-xylose containing structures, those that have additional monosaccharides on the  $\alpha$ -3 mannose ( $\Delta$ ) and those that miss the core  $\alpha$ -6 mannose (\*) are indicated. The order in which the individual anti-glycan responses are shown is kept the same for all four subclasses.
